# Supplementary material
Source: Springer Nature journal article supplement (https://www.springermedizin.de/resource/supplementary/12874_2010_652_MOESM11_ESM.pdf/9432328)

**ARQ-Pilot**

**ARQ-Rev1**

**ARQ-Final**

**INDIVIDUAL**

**INDIVIDUAL**

**INDIVIDUAL**

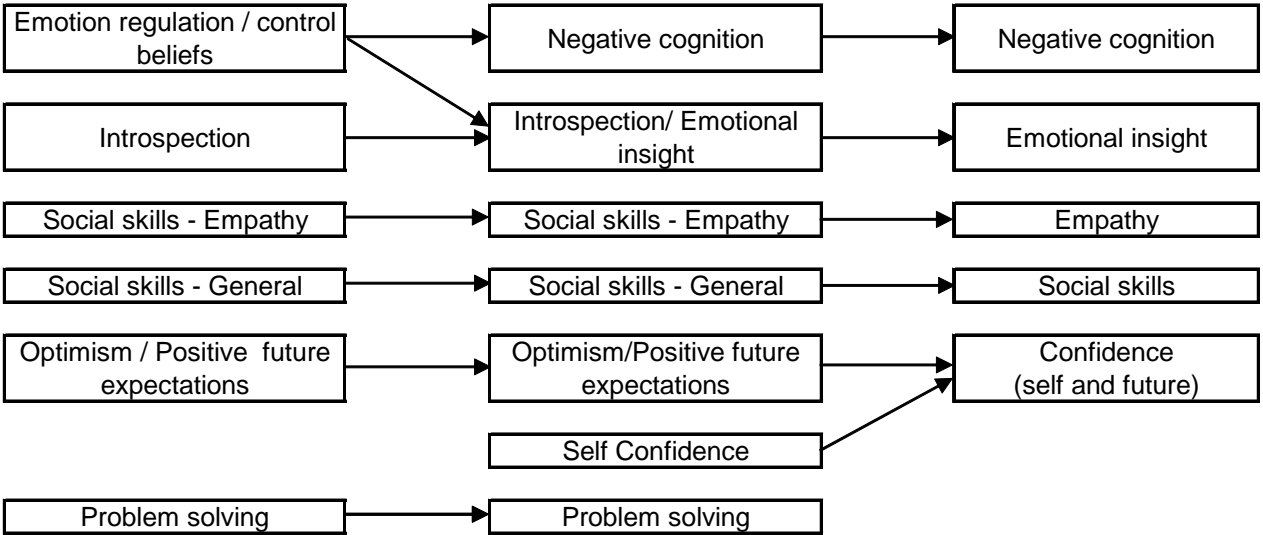

**FAMILY**

**FAMILY**

**FAMILY**

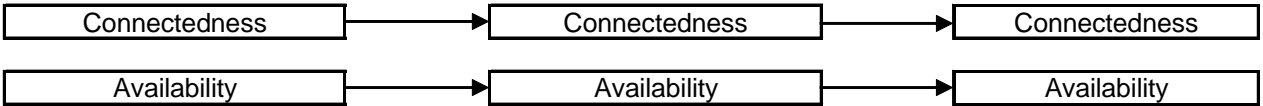

**PEERS**

**PEERS**

**PEERS**

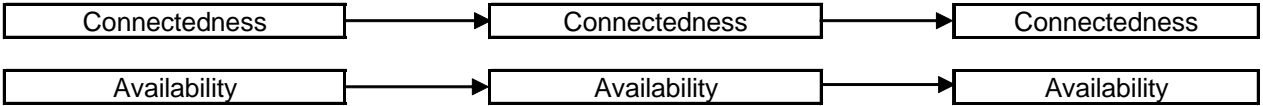

**SCHOOL**

**SCHOOL**

**SCHOOL**

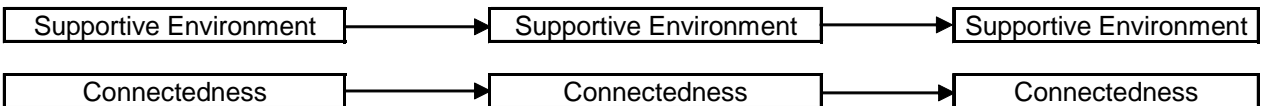

**COMMUNITY**

**COMMUNITY**

**COMMUNITY**

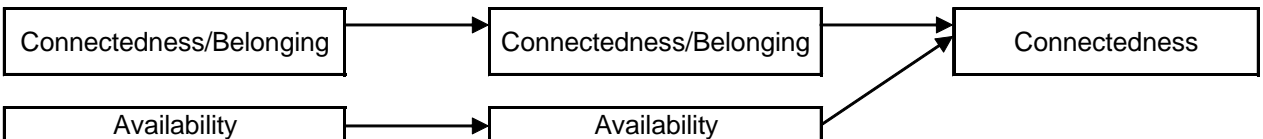

Supplement: MOESM11 [file 9432328]
